# Supplementary material for: Studies on gold–nitrone systems
Source: Royal Society of Chemistry journal article supplement (doi:10.1039/c8dt04254c), 2018-11-19

## Supporting Information

### Studies on Gold-Nitrone Systems

**H. F. Jónsson and A. Fiksdahl**

Department of Chemistry, Norwegian University of Science and Technology,

7491 Trondheim, Norway

e-mail: [anne.fiksdahl@chem.ntnu.no](mailto:anne.fiksdahl@chem.ntnu.no)

<sup>1</sup>H and <sup>13</sup>C NMR spectra of:

|                                                                                                                               |         |
|-------------------------------------------------------------------------------------------------------------------------------|---------|
| Au(I)-nitrone complexes <b>I-2a</b> , <b>I-2a'</b> , <b>I-2a''</b> , <b>I-2b</b> , <b>I-2c</b> , <b>II-2a</b> , <b>III-2b</b> | S2-S8   |
| Au-oxadiazole complexes Au(I) <b>I-4a</b> and Au(III)- <b>4a</b>                                                              | S9-S10  |
| Dihydro-1,2,4-oxadiazoles <b>4a</b> , <b>4c</b> , <b>4d</b> , <b>4e</b> , <b>4f</b>                                           | S11-S15 |

# 6. <sup>1</sup>H and <sup>13</sup>C Spectra

NMR

<sup>1</sup>H and <sup>13</sup>C NMR

spectra of I-2a

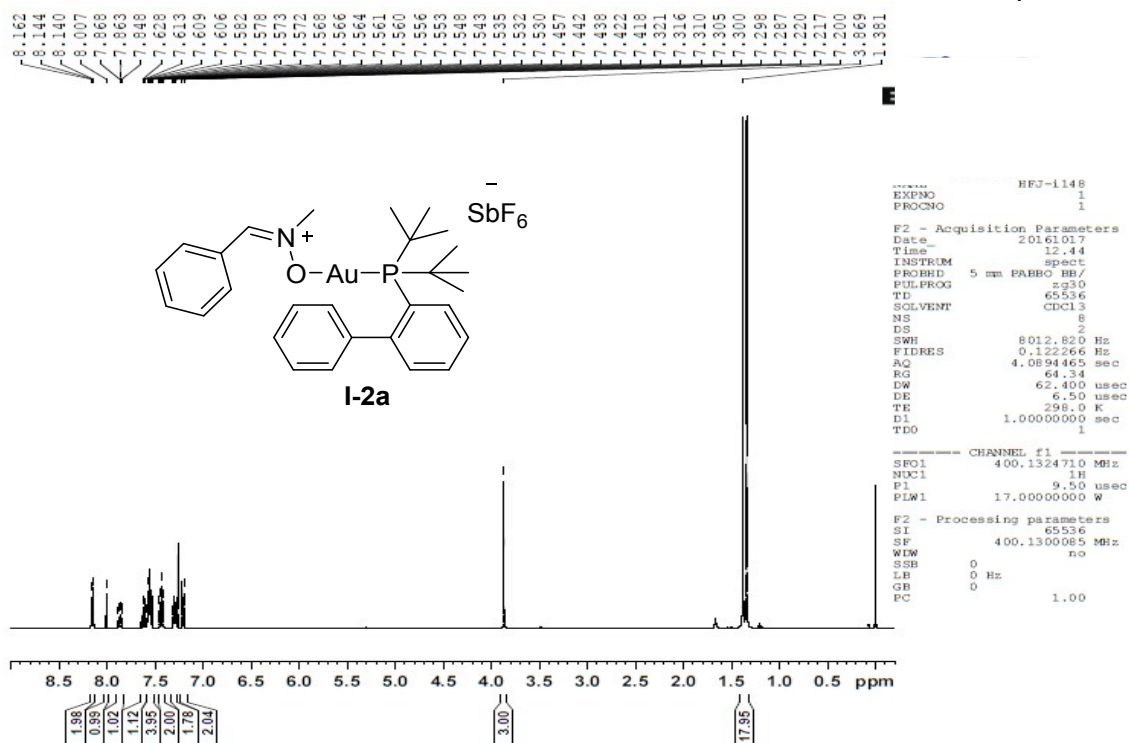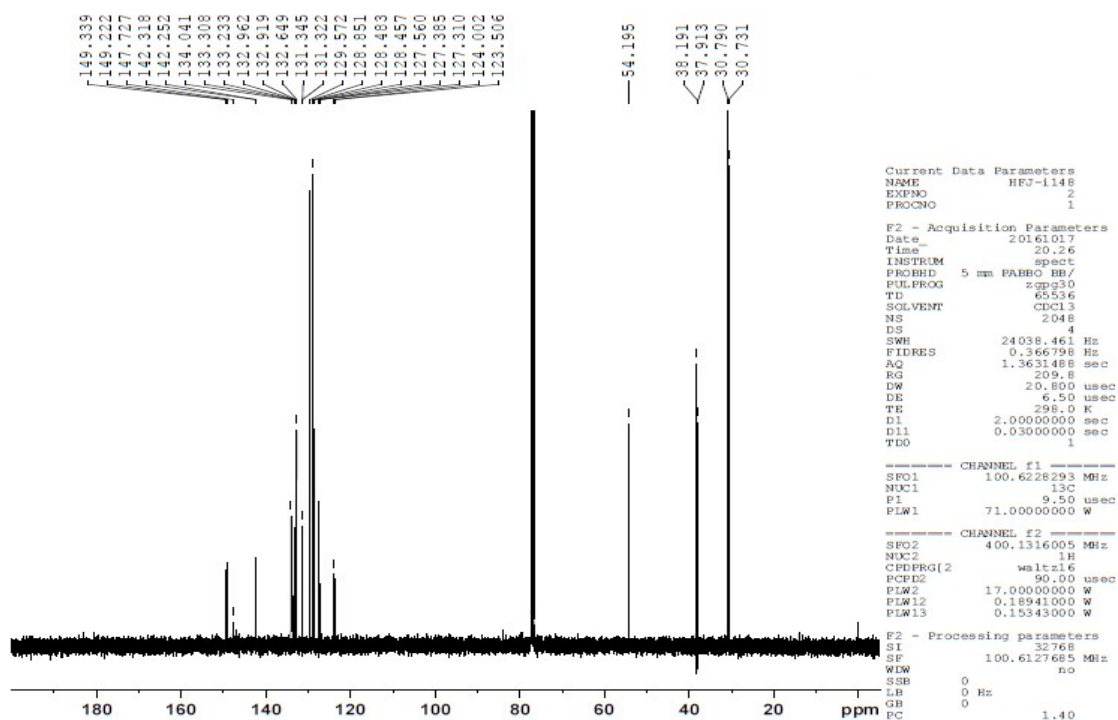

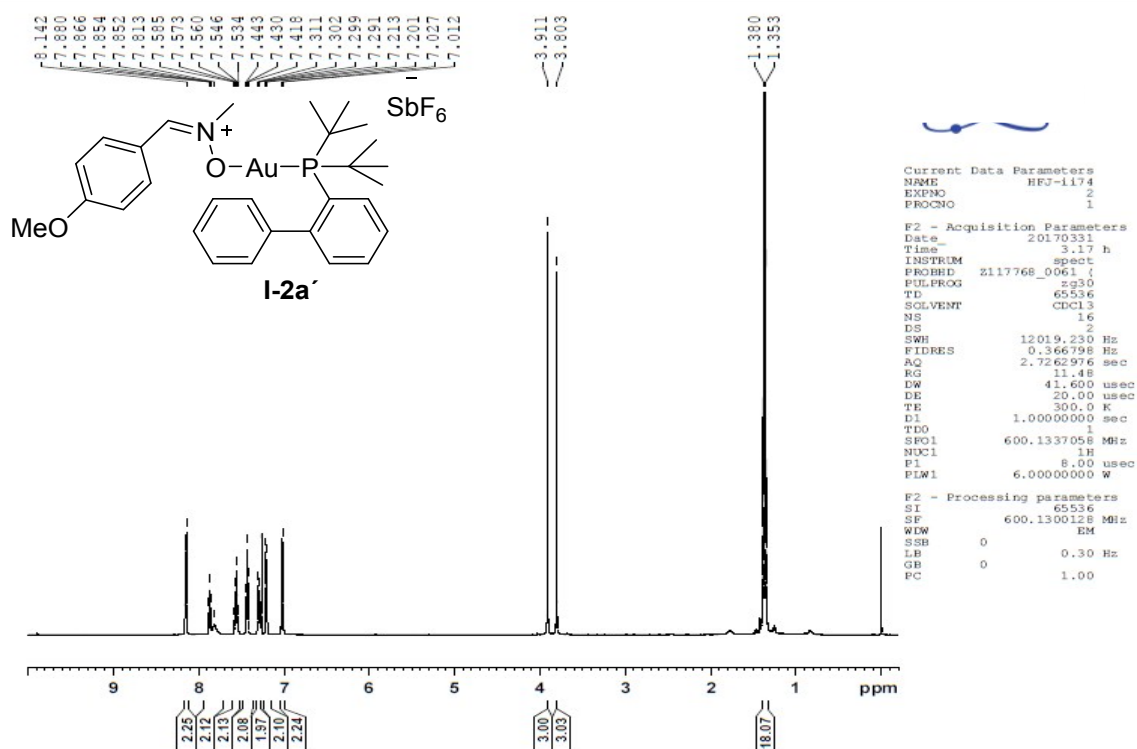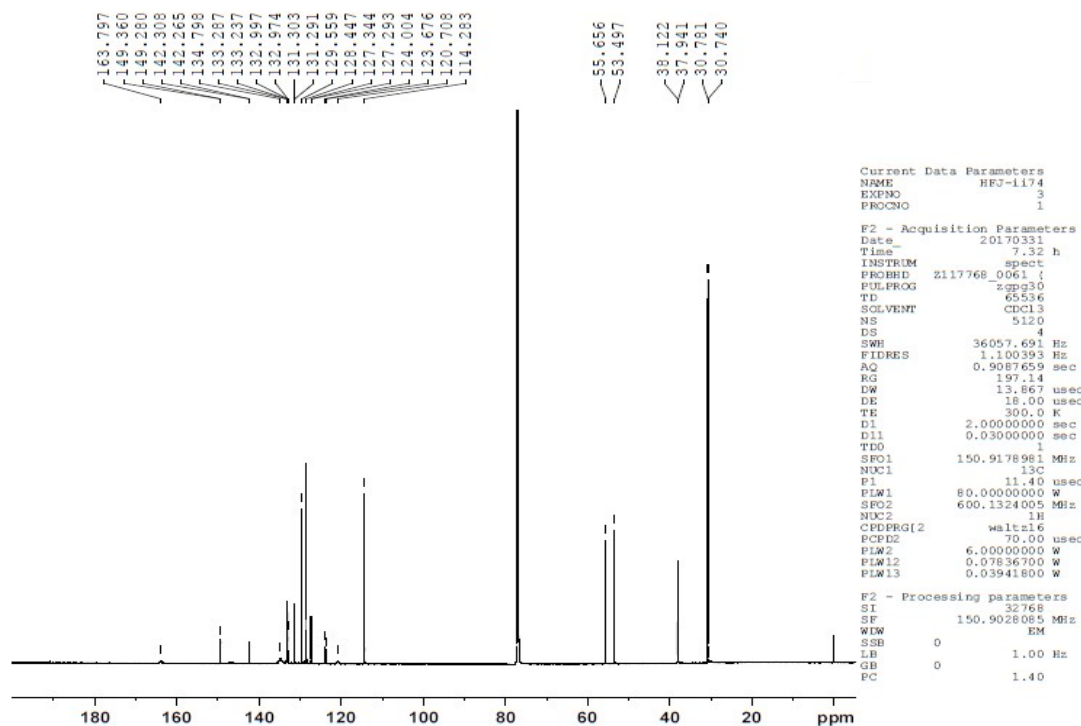

<sup>1</sup>H and <sup>13</sup>C  
2a''

NMR spectra of I-

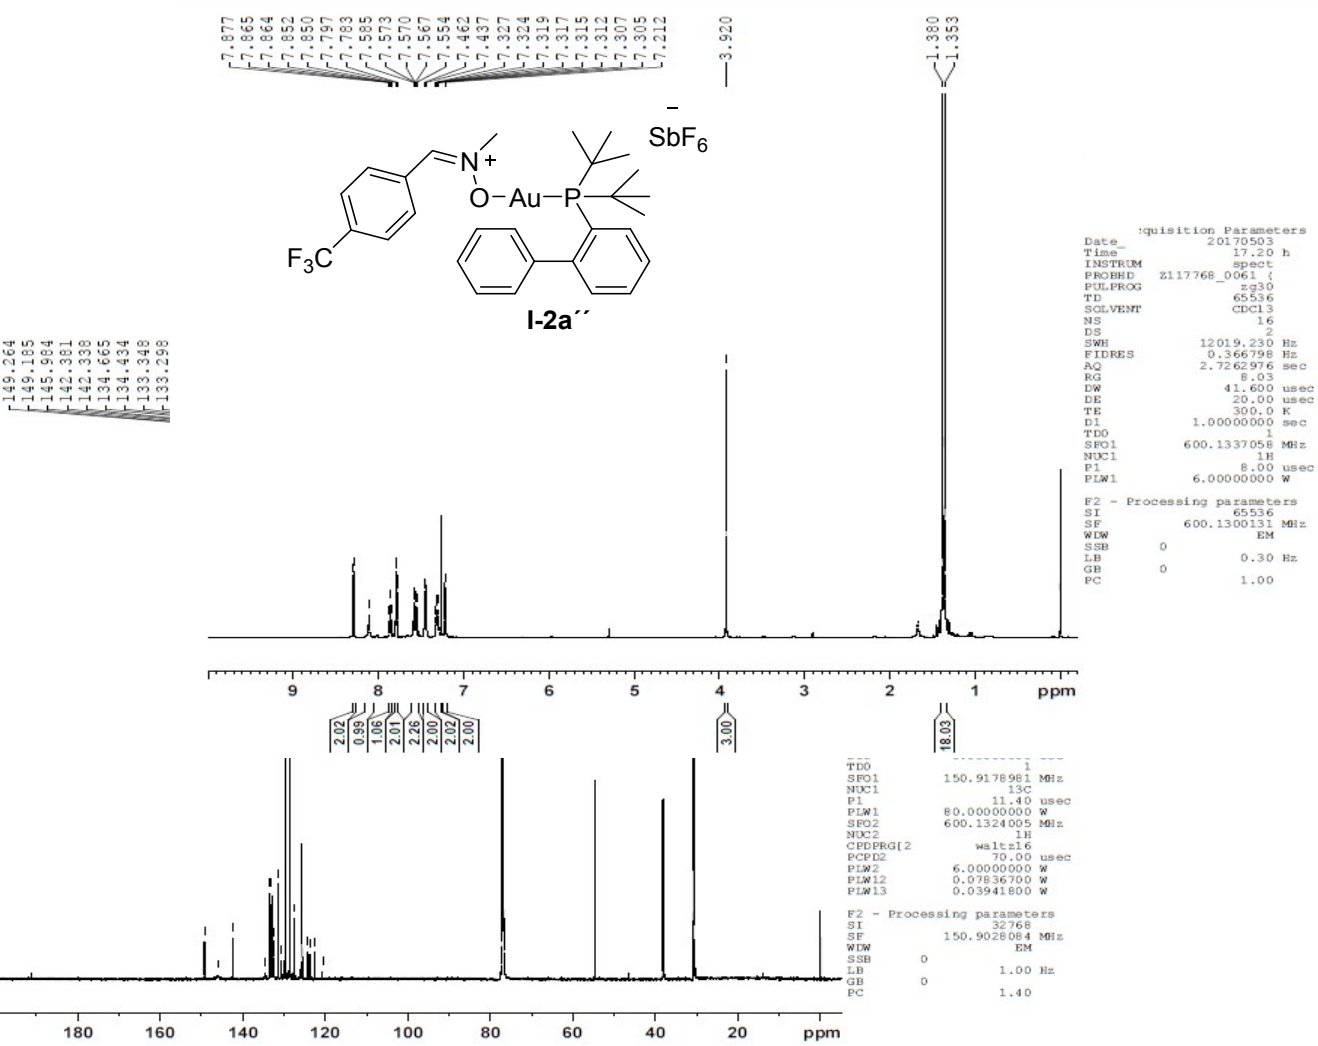

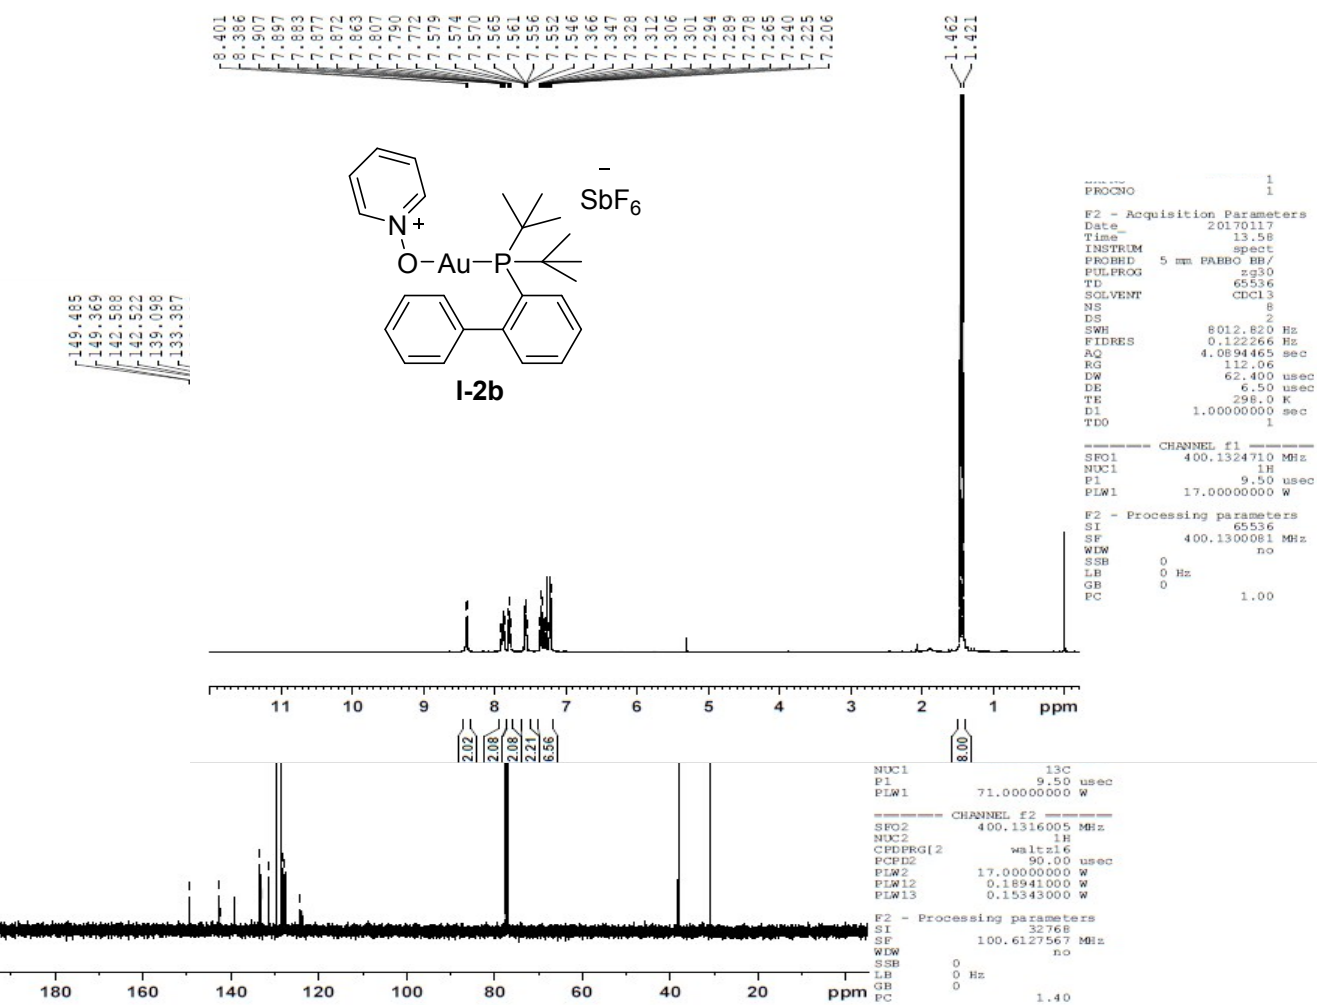

<sup>1</sup>H and <sup>13</sup>C  
2c

NMR spectra of I-

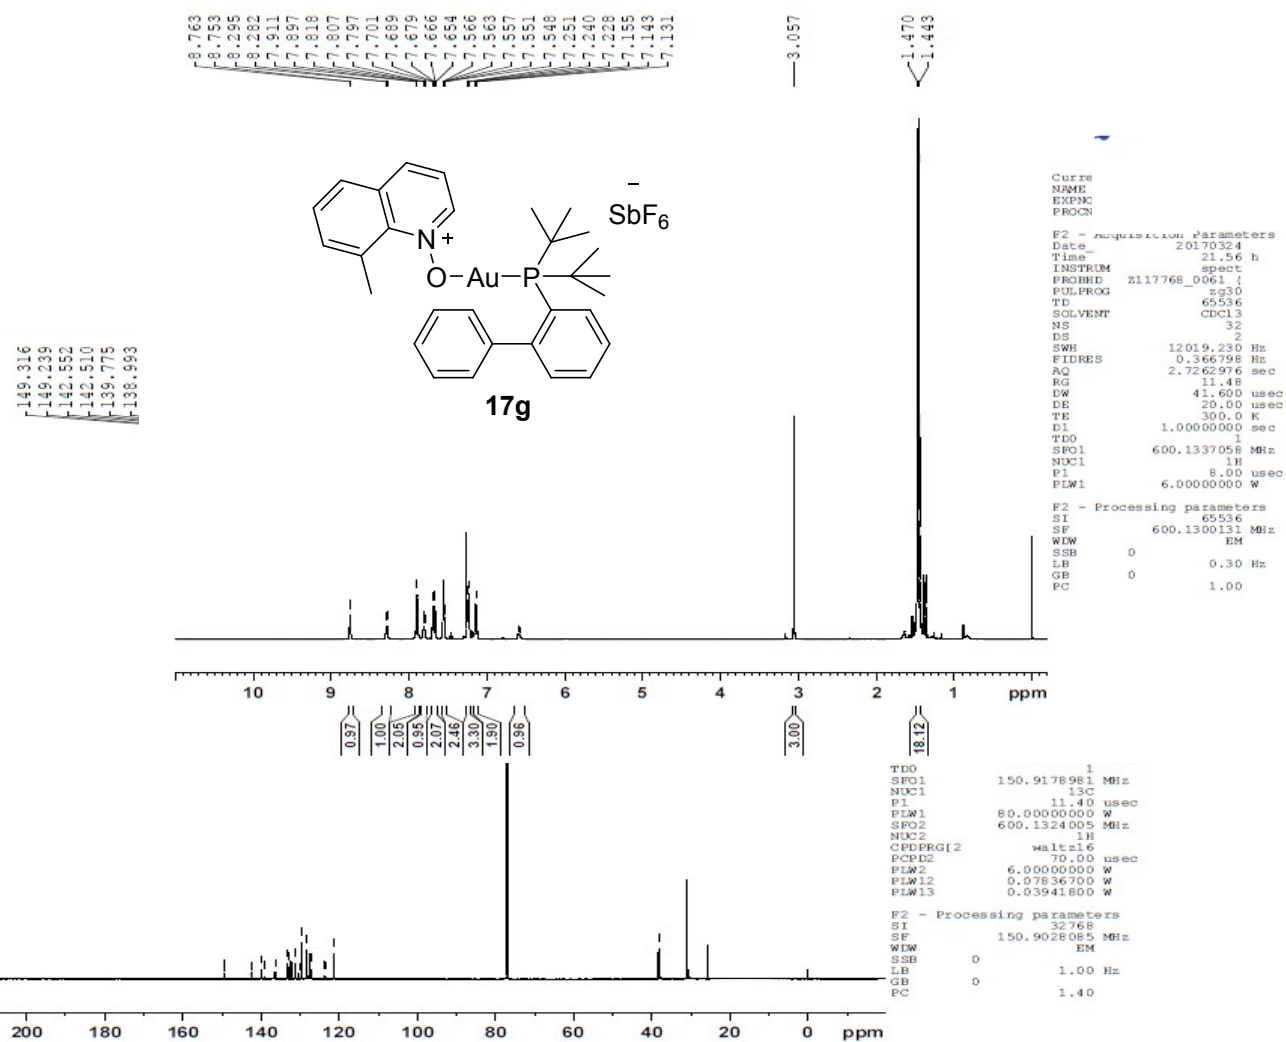

<sup>1</sup>H and <sup>13</sup>C NMR

SbF<sub>6</sub> spectra of II-2a

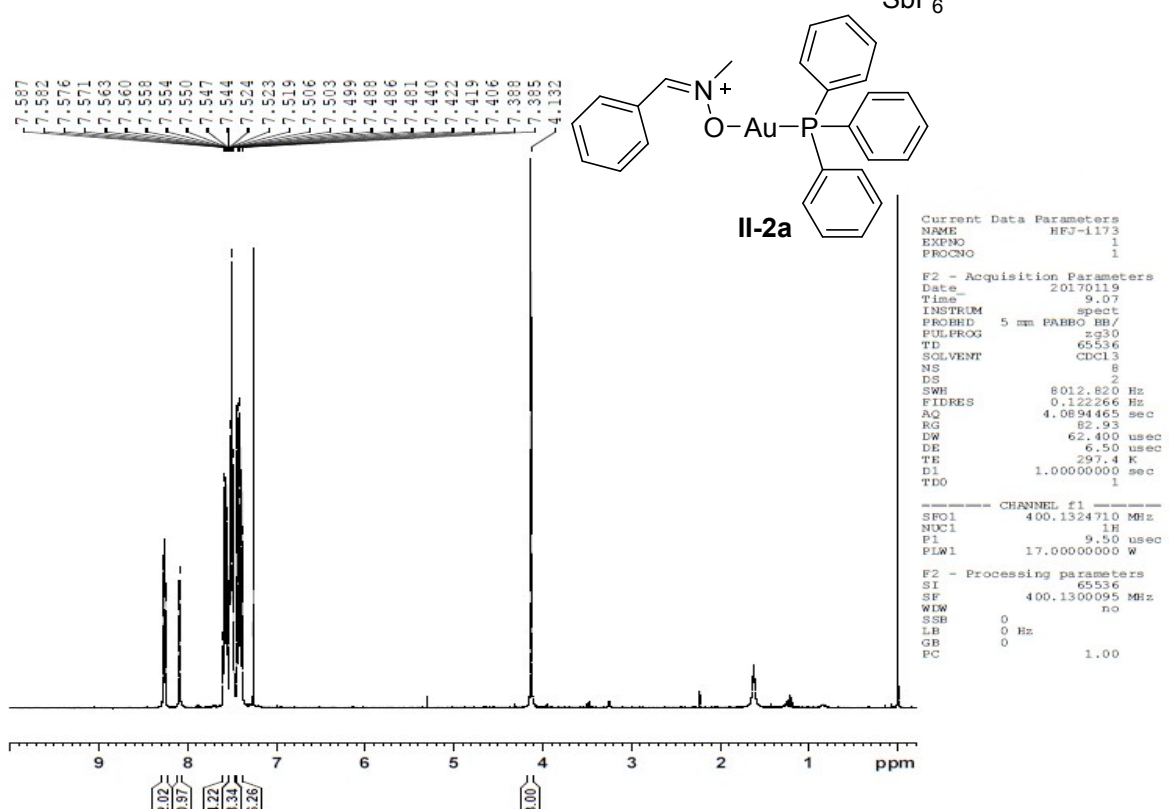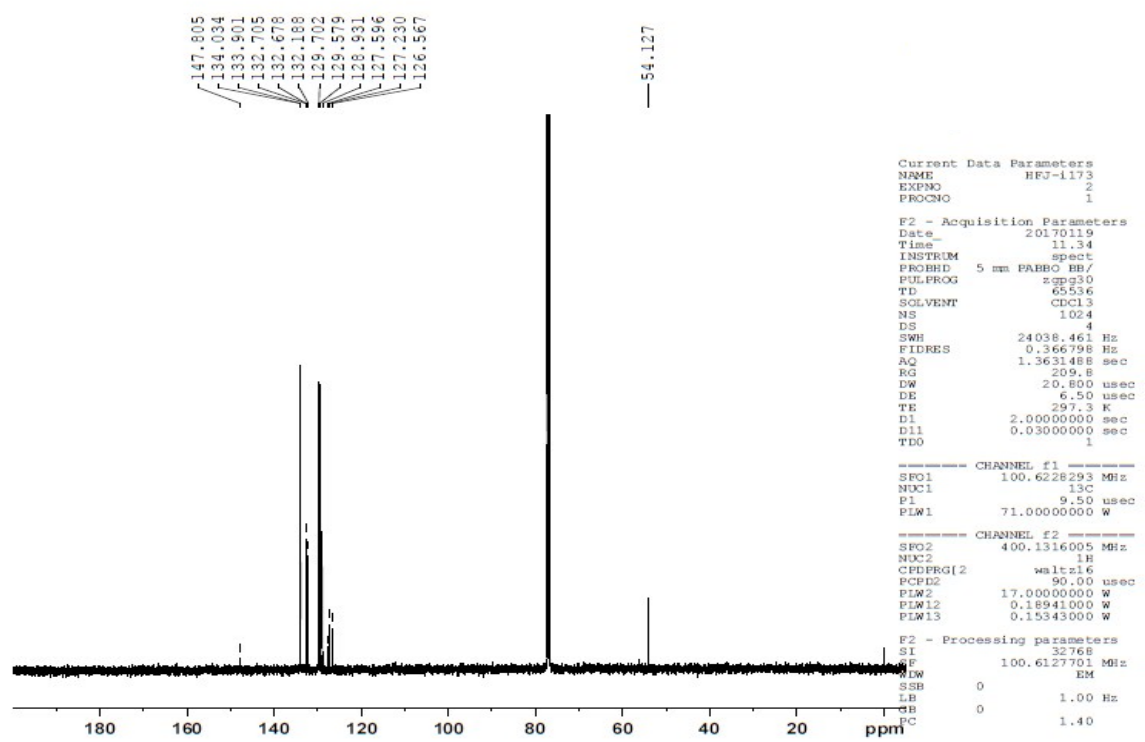

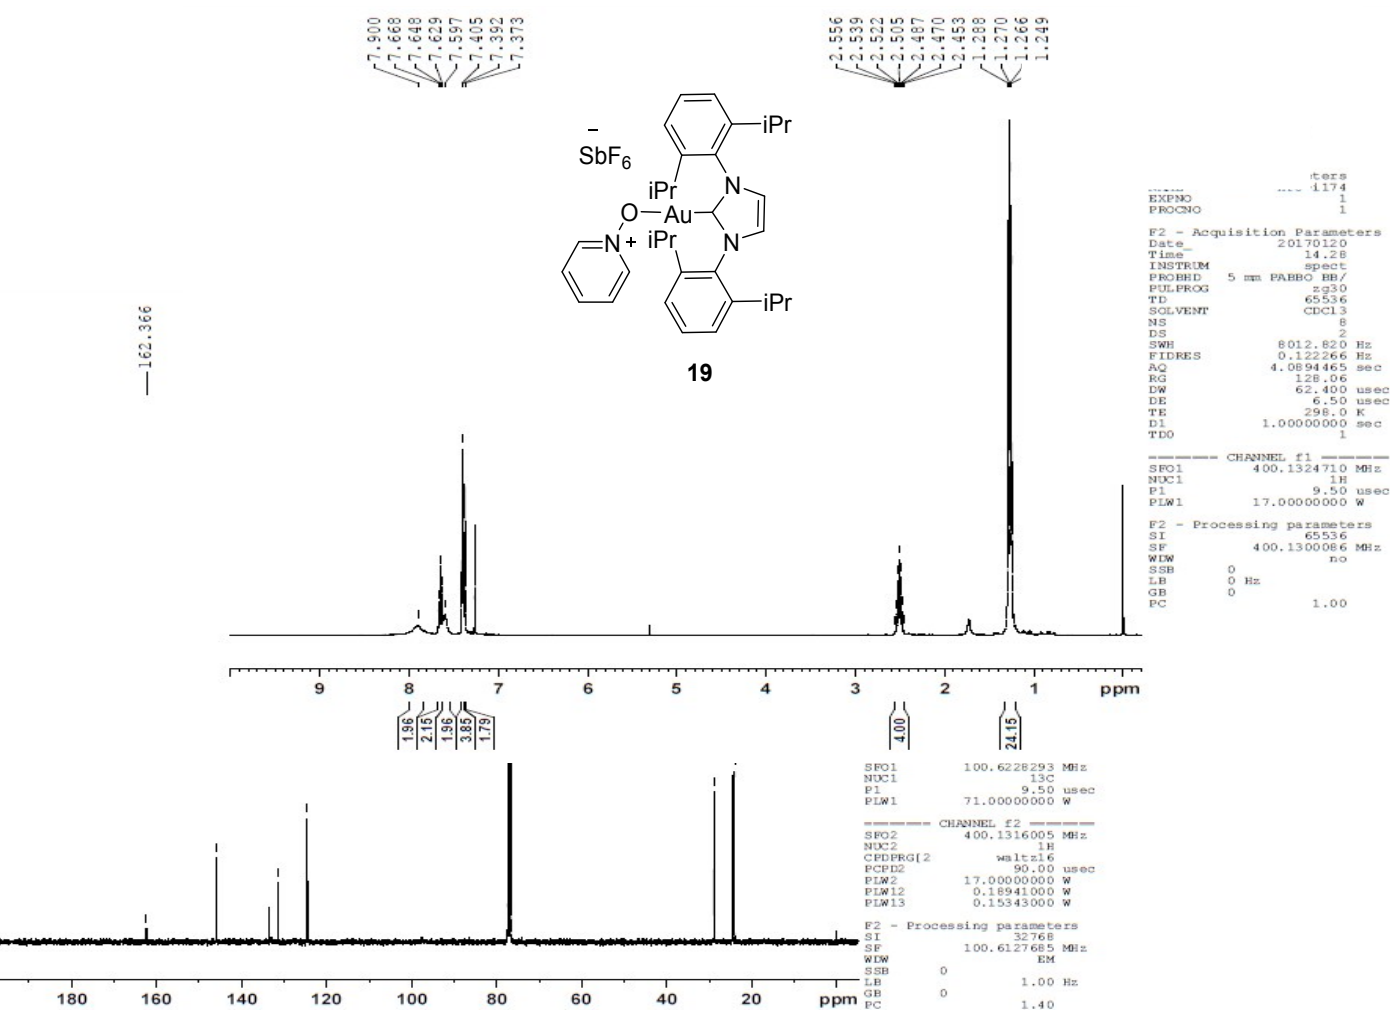



<sup>1</sup>H and <sup>13</sup>C NMR  
I-4a

spectra of Au(I)-

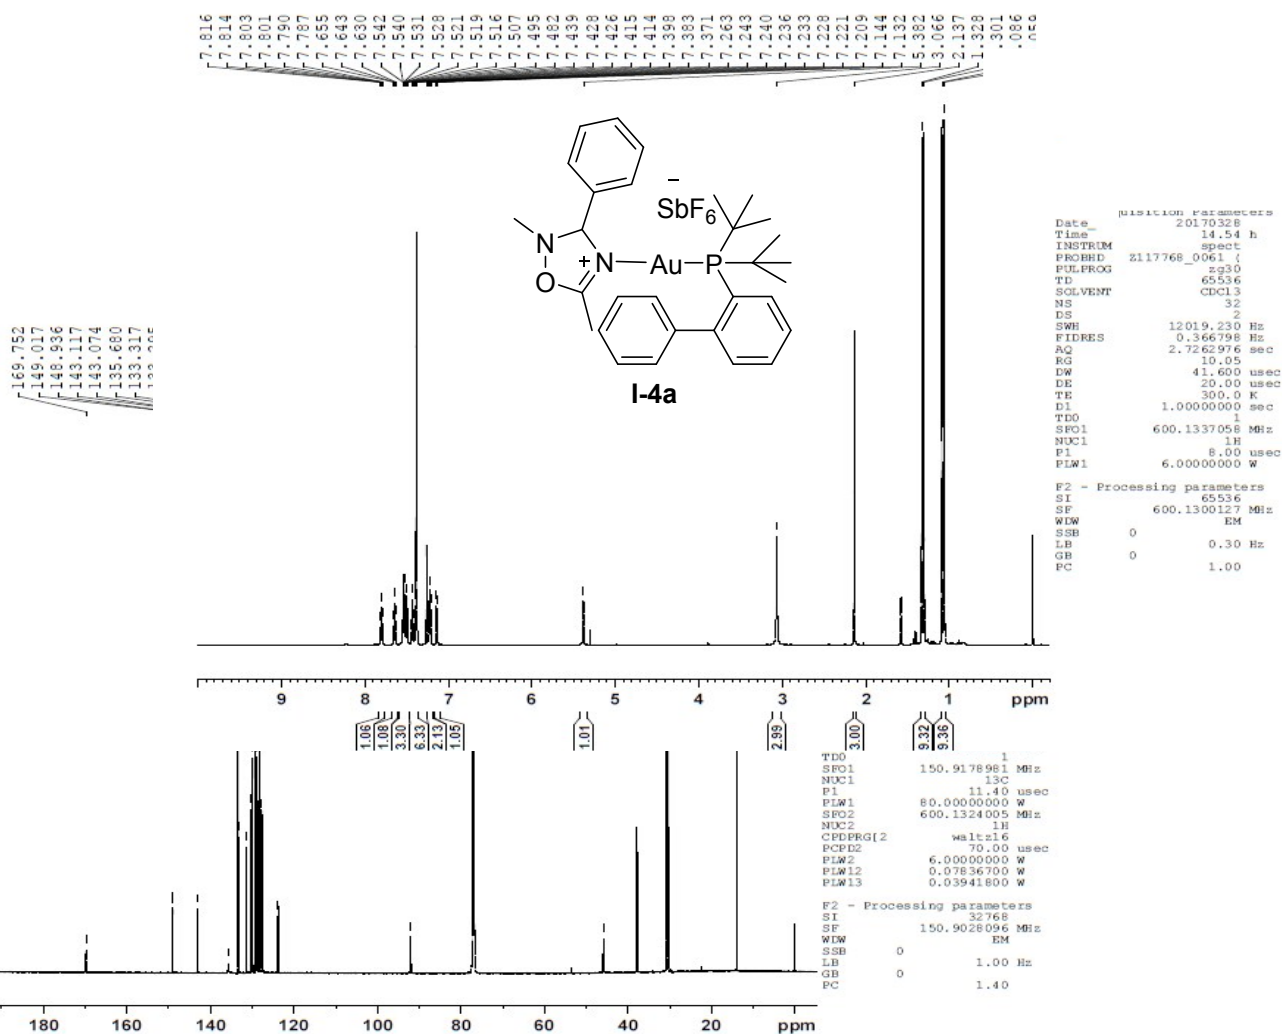

Crude <sup>1</sup>H NMR  
**Au(III)-4a**

spectrum of

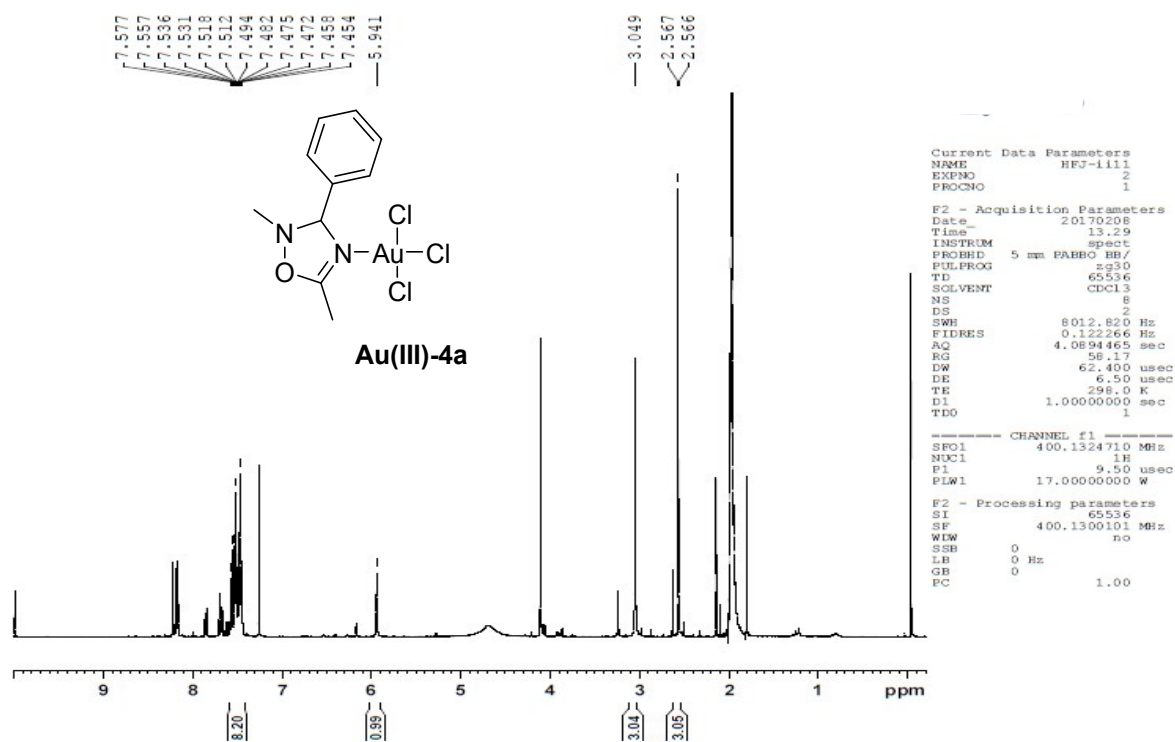

<sup>1</sup>H NMR

spectrum of **4a**

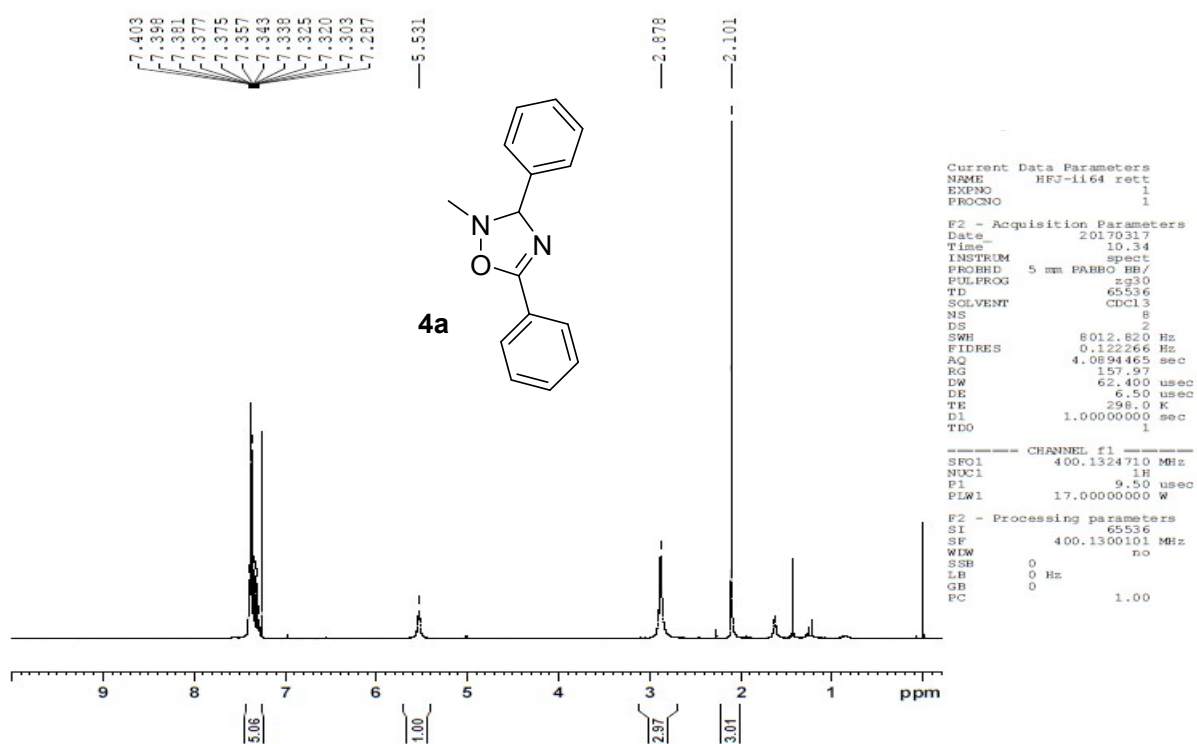

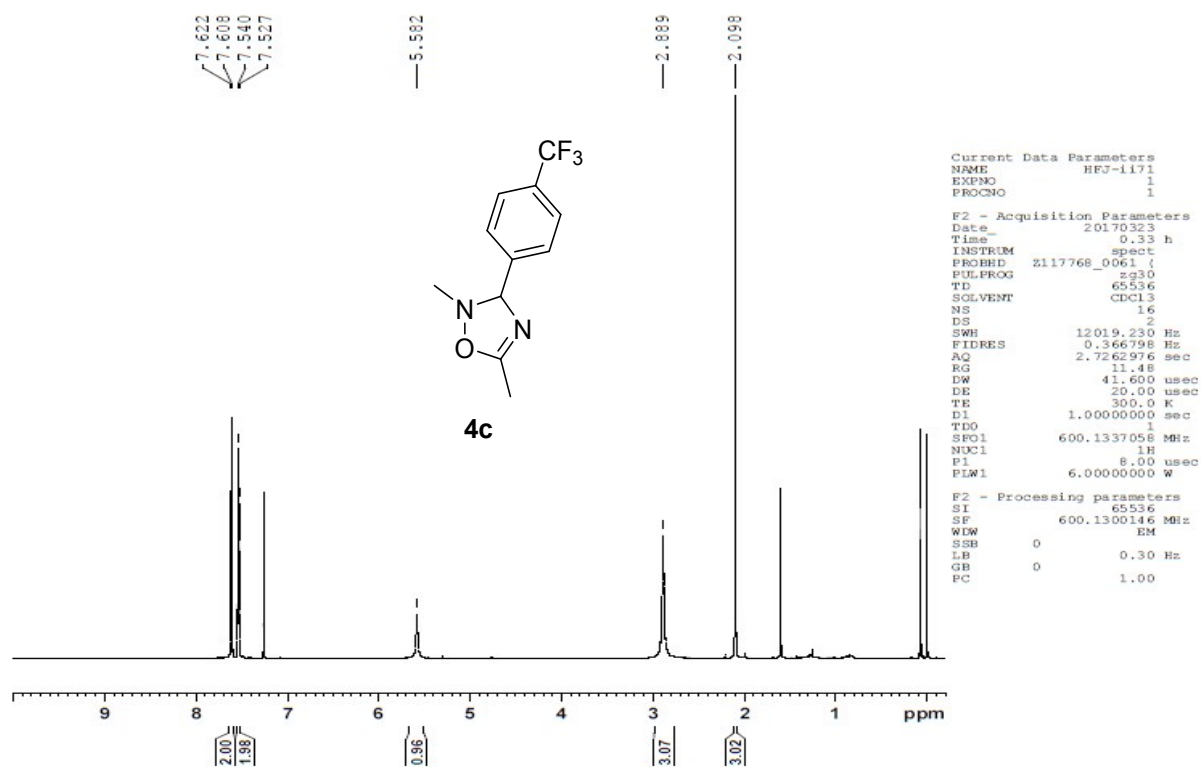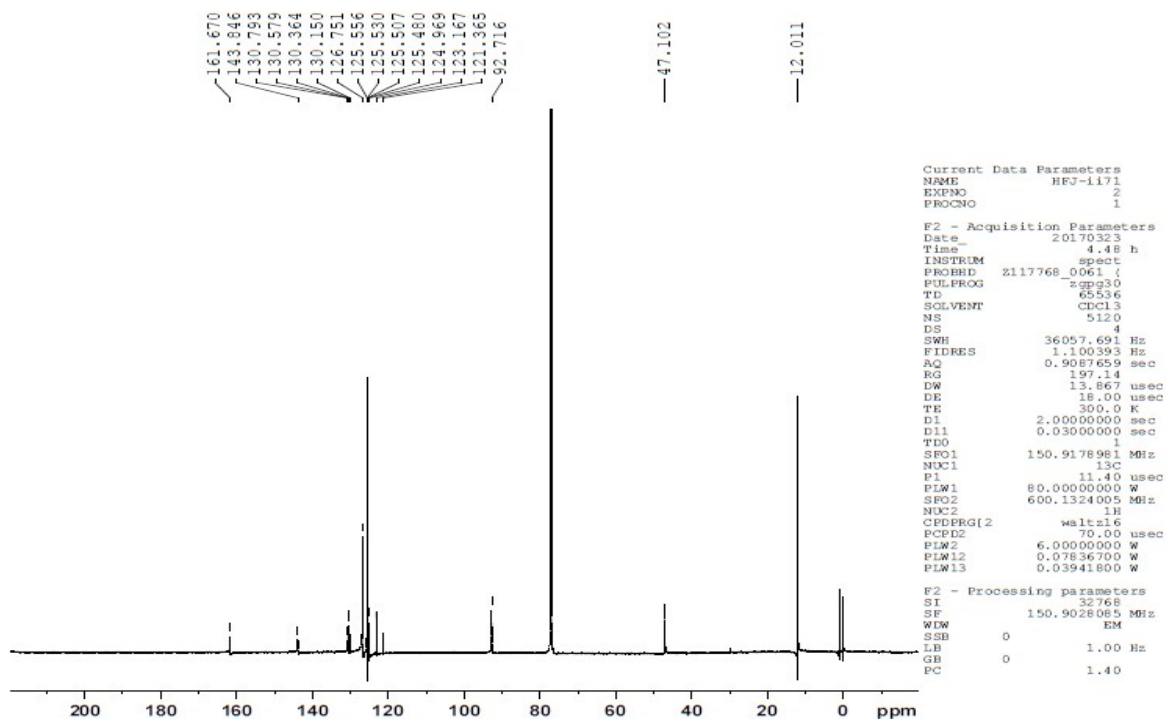

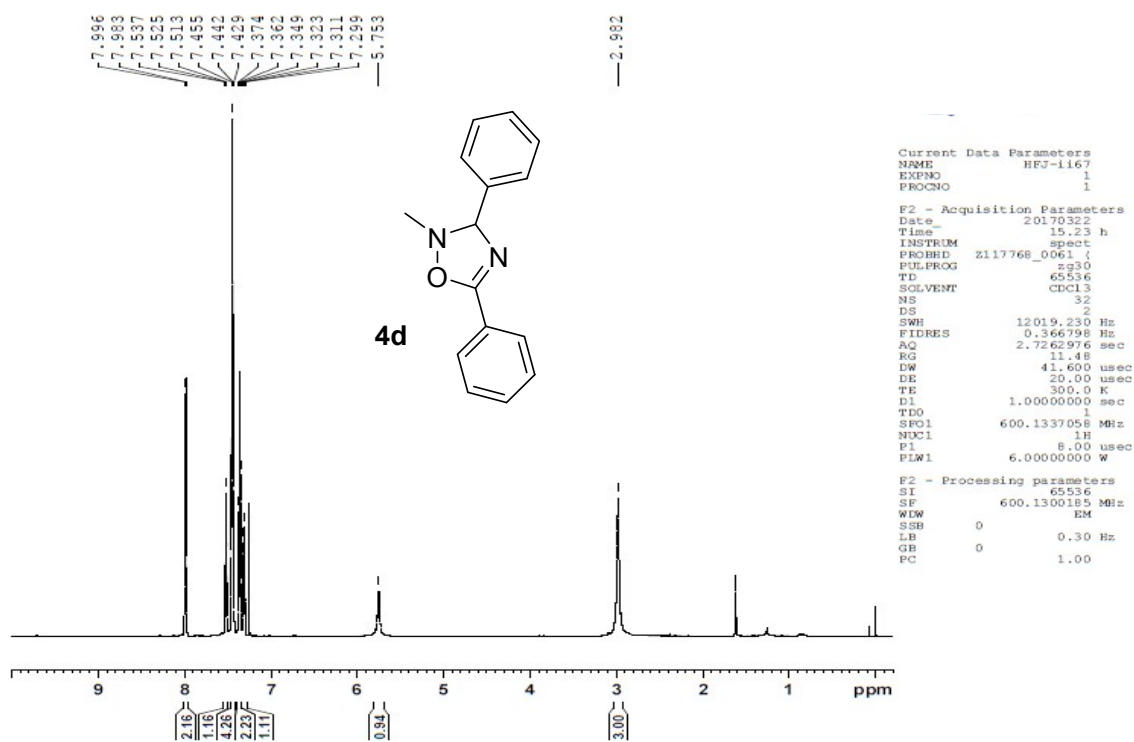

<sup>1</sup>H

NMR

spectrum of 4e

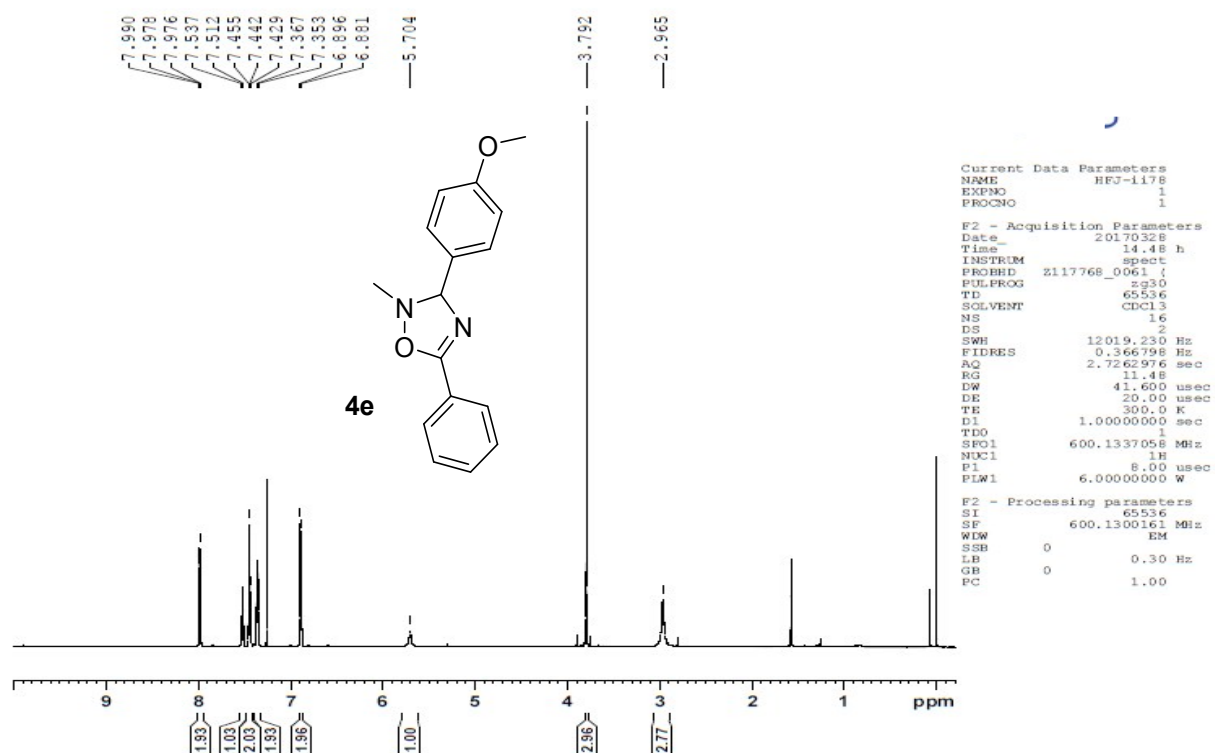

<sup>1</sup>H and <sup>13</sup>C NMR

spectra of 4f

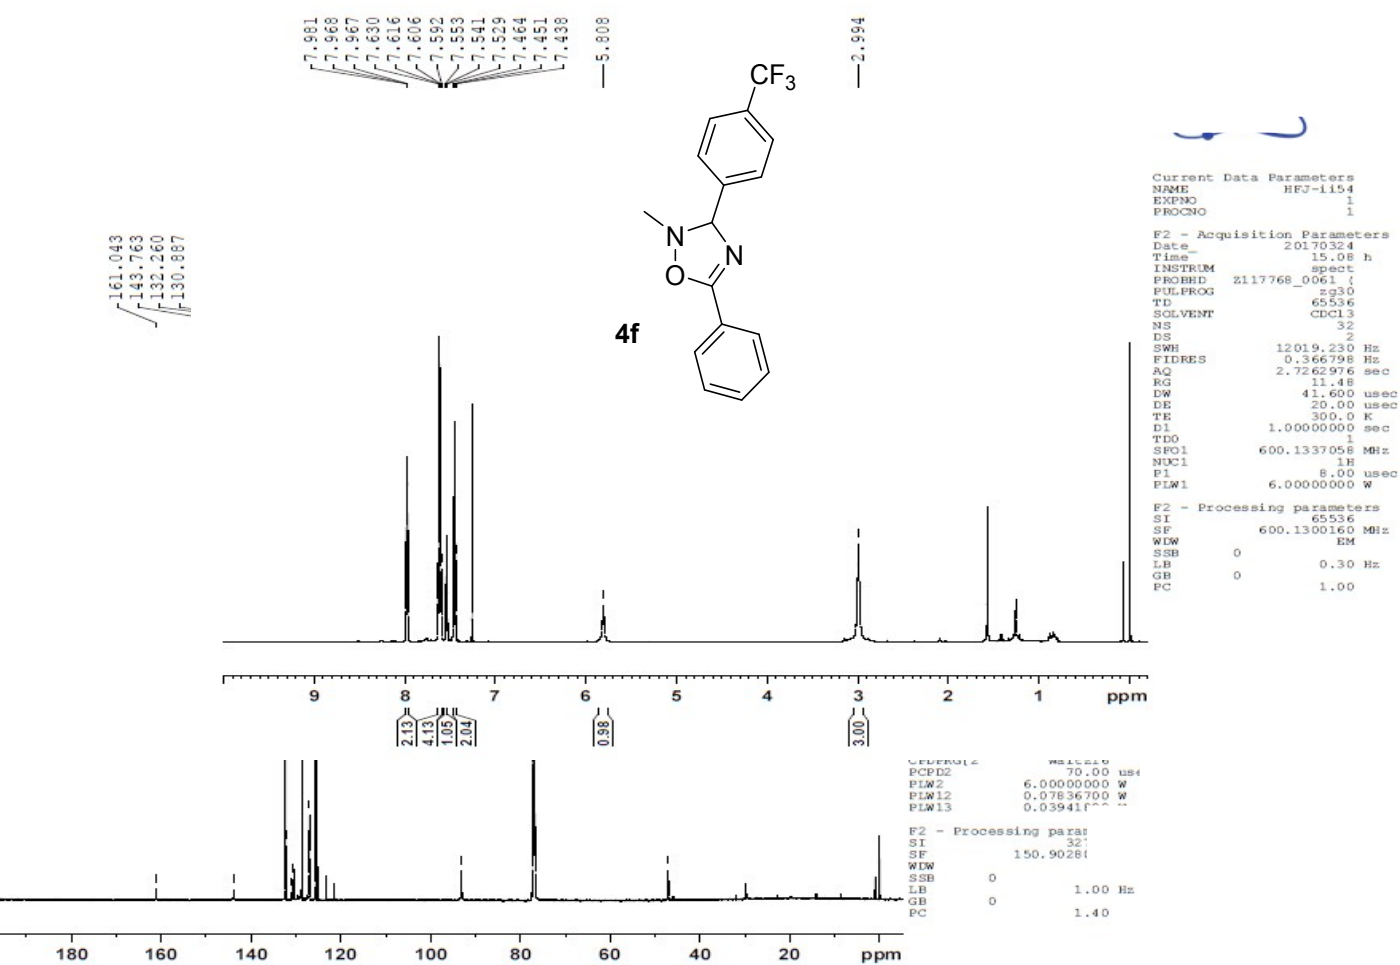

Supplement: c8dt04254c1.pdf [file c8dt04254c1.pdf]
